# Supplementary material for: A workflow to identify novel proteins based on the direct mapping of peptide-spectrum-matches to genomic locations
Source: Springer Nature journal article supplement (doi:10.1186/s12859-021-04159-8), 2021-05-26
Supplement: 12859_2021_4159_MOESM1_ESM.pdf [file 12859_2021_4159_MOESM1_ESM.pdf]

**ADDITIONAL FILE 1**

# SUPPLEMENTAL FIGURES AND TABLES

A workflow to identify novel proteins based on the direct mapping of Peptide-Spectrum-Matches to genomic locations

John Anders, Hannes Petruschke, Nico Jehmlich, Sven-Bastiaan Haange, Martin von Bergen and Peter F Stadler

### Supplemental Figures

**Supplemental Figure 1.** The number of proteins that are identified only with the proteome and the 6frame databases for the *E. coli* data set, respectively, as a function of the minimal number  $k$  of PSMs required to call a protein. The graph summarizes the stacked bar plot corresponding to Fig. 1 of the the main text.

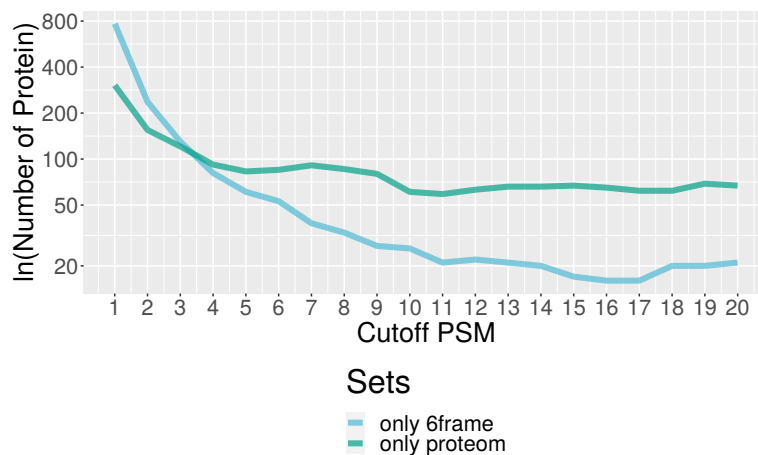

**Supplemental Figure 2.** False discovery rate (FDR) of proteins as a function of the minimum number of PSMs required to call a protein candidate of *E. coli*. The  $FDR_{prot}$  is estimated from the number of non-annotated candidates, assuming that the *E. coli* annotation is complete.

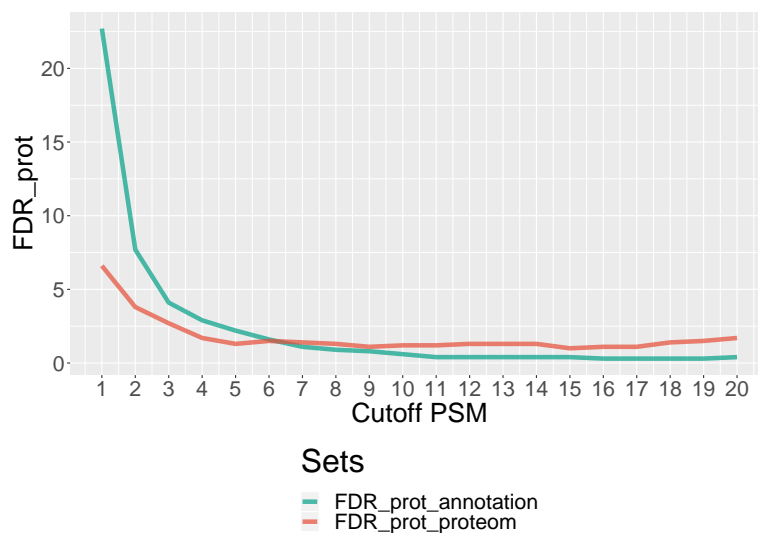

**Supplemental Figure 3.** The relation of the genomic (red) and annotation (blue) based  $FDR_{genome/anno}$  and the  $FDR_{decoy}$  inferred by the target decoy method. The black line represents a perfectly proportional relationship between  $FDR_{genome/anno}$  and  $FDR_{decoy}$ . The  $FDRs$  are plotted for all experimental replicas.

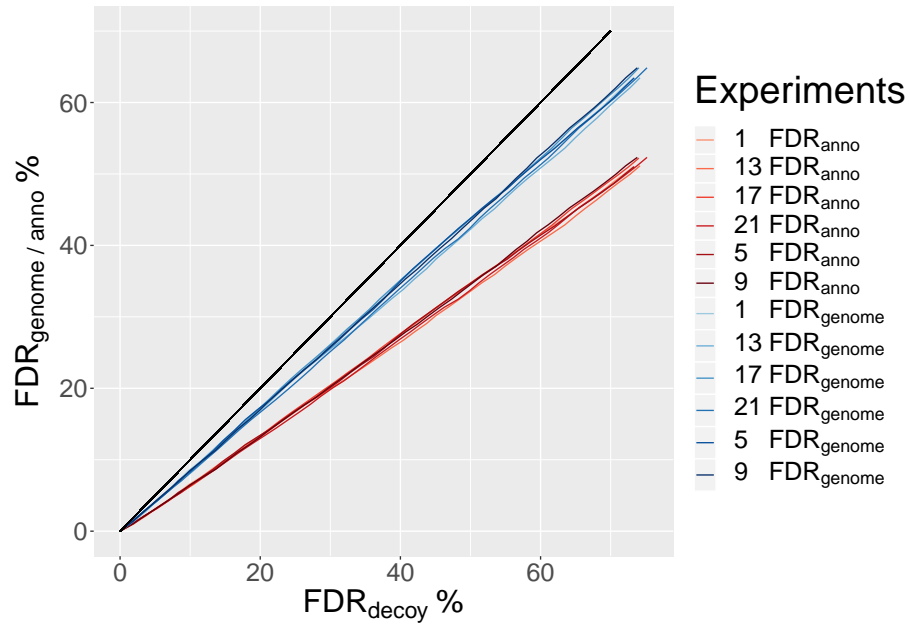

**Supplemental Figure 4.** Protein candidate 57 in *B. producta*, for which only hypothetical homologs can be found. The top of the figure shows a view in the UCSC Genome Browser. The first track show the reading frame of the genome on the negative strand. The second track is the protein candidate 5's predicted ORF. The next track shows a bar plot representation the reads per base mapping to protein candidate 5 from the transcriptomic data. At the bottom a list of the mapped PSMs can be found. The rightmost PSM is ambiguous and provides little evidence for the candidate. Below three mass spectra for top confidence PSMs and the corresponding peptides are shown.

nov 57

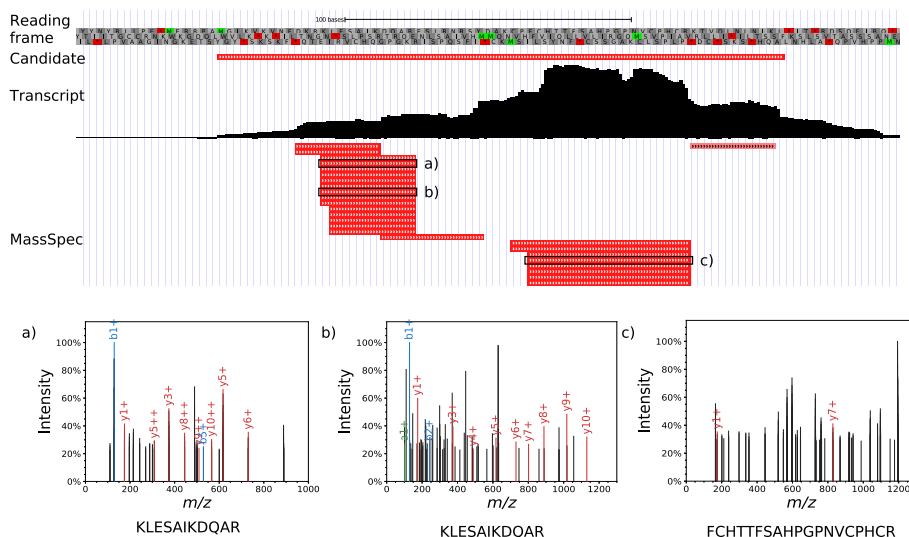

## Supplemental Tables

**Supplemental Table 1.** Comparison of predicted protein candidates between 6-frame database and a proteome database based on existing annotation including hypothetical protein.

| 10 PSM              |         |          |         |          |         |          |         |
|---------------------|---------|----------|---------|----------|---------|----------|---------|
| species             | nov     | hypo     |         | known    |         | $\Sigma$ |         |
|                     | 6-frame | proteome | 6-frame | proteome | 6-frame | proteome | 6-frame |
| <i>B. theta.</i>    | 37      | 1975     | 2079    | 248      | 254     | 2500     | 4706    |
| <i>B. producta</i>  | 52      | 1138     | 1214    | 132      | 138     | 1559     | 2857    |
| <i>E. coli</i>      | 26      | 150      | 136     | 988      | 1061    | 1370     | 2538    |
| <i>E. ramosum</i>   | 10      | 355      | 373     | 53       | 62      | 541      | 944     |
| <i>B. longum</i>    | 16      | 128      | 153     | 0        | 0       | 202      | 356     |
| <i>A. caccae</i>    | 17      | 549      | 597     | 100      | 103     | 841      | 1456    |
| <i>L. plantarum</i> | 31      | 83       | 109     | 28       | 39      | 194      | 342     |
| <i>C. butyricum</i> | 14      | 135      | 181     | 32       | 37      | 303      | 422     |

  

| 6 PSM               |         |          |         |          |         |          |         |
|---------------------|---------|----------|---------|----------|---------|----------|---------|
| species             | nov     | hypo     |         | known    |         | $\Sigma$ |         |
|                     | 6-frame | proteome | 6-frame | proteome | 6-frame | proteome | 6-frame |
| <i>B. theta.</i>    | 72      | 2118     | 2238    | 256      | 262     | 2500     | 4706    |
| <i>B. producta</i>  | 103     | 1289     | 1411    | 143      | 148     | 1559     | 2857    |
| <i>E. coli</i>      | 65      | 182      | 183     | 1127     | 1187    | 1370     | 2538    |
| <i>E. ramosum</i>   | 30      | 431      | 465     | 65       | 76      | 541      | 944     |
| <i>B. longum</i>    | 42      | 170      | 202     | 0        | 0       | 202      | 356     |
| <i>A. caccae</i>    | 39      | 632      | 721     | 119      | 120     | 841      | 1456    |
| <i>L. plantarum</i> | 48      | 116      | 147     | 36       | 47      | 194      | 342     |
| <i>C. butyricum</i> | 26      | 176      | 257     | 39       | 46      | 303      | 422     |

**Supplemental Table 2.** Full list of species in SIHUMix and the corresponding NCBI assembly and taxonomy ID.

| full name                                                                             | taxid   | assembly id     |
|---------------------------------------------------------------------------------------|---------|-----------------|
| <i>Anaerostipes caccae</i> DSM 14662                                                  | 411490  | GCA_014131675.1 |
| <i>Bacteroides thetaiotaomicron</i> VPI5482                                           | 226186  | GCA_014131755.1 |
| <i>Bifidobacterium longum</i> NCC2705                                                 | 206672  | GCF_000007525.1 |
| <i>Blautia producta</i> ATCC 27340 DSM 2950                                           | 1121114 | GCA_014131715.1 |
| <i>Clostridium butyricum</i> DSM 10702                                                | 1316931 | GCA_014131795.1 |
| <i>Escherichia coli</i> str K12 substr MG1655                                         | 511145  | GCF_000005845.2 |
| <i>Erysipelatoclostridium ramosum</i> DSM 1402                                        | 445974  | GCA_014131695.1 |
| <i>Lactobacillus plantarum</i> subsp <i>plantarum</i> ATCC 14917 JCM 1149 CGMCC 12437 | 525338  | GCA_014131735.1 |
